# Supplementary material for: Investigating the Invasion Pattern of the Alien Plant Solanum elaeagnifolium Cav. (Silverleaf Nightshade): Environmental and Human-Induced Drivers
Source: MDPI journal article supplement (doi:10.3390/plants10040805), 2021-04-20
Supplement: s1 [file s1]

## Supplementary material

**Appendix S1:** Partial inventories of *Solanum elaeagnifolium* conducted in different prefectures of Greece during the period 2000-2015, and their verification year confirming its current status of invasion (2016-2020)

| <b>Greek prefecture</b>  | <b>Partial inventories / years</b> | <b>Verification year</b> | <b>Total inventories</b> |
|--------------------------|------------------------------------|--------------------------|--------------------------|
| Eastern Macedonia-Thraki | 3 / 2007, 2008, 2009               | 2016                     | 4                        |
| Central Macedonia        | 4 / 2000, 2005, 2010, 2015         | 2020                     | 5                        |
| Western Macedonia        | 3 / 2008, 2015, 2016               | 2020                     | 4                        |
| Epirus                   | 4 / 2001, 2006, 2010, 2014         | 2018                     | 5                        |
| Thessaly                 | 4 / 2007, 2010, 2013, 2015         | 2020                     | 5                        |
| North Aegean Islands     | 3 / 2008, 2012, 2013               | 2018                     | 4                        |
| South Aegean Islands     | 4 / 2010, 2011, 2013, 2015         | 2017                     | 5                        |
| Central Greece           | 5 / 2001, 2006, 2010, 2015         | 2019                     | 5                        |
| Western Greece           | 3 / 2000, 2004, 2008               | 2017                     | 4                        |
| Peloponnese              | 4 / 2001, 2002, 2010, 2011         | 2020                     | 5                        |
| Ionian Islands           | 5 / 2007, 2008, 2009, 2010         | 2019                     | 5                        |
| Crete                    | 5 / 2010, 2013, 2014, 2015         | 2020                     | 5                        |
| Attica                   | 4 / 2003, 2007, 2010, 2015         | 2019                     | 5                        |
| Agion Oros               | 3 / 2003, 2008, 2015               | 2017                     | 4                        |
