# Supplementary material for: Investigating the Invasion Pattern of the Alien Plant Solanum elaeagnifolium Cav. (Silverleaf Nightshade): Environmental and Human-Induced Drivers
Source: MDPI journal article supplement (doi:10.3390/plants10040805), 2021-04-20
Supplement: s1 [file s1]

## Supplementary material

**Appendix S3.** Profile of non-biotic parameters for the non-invaded and the invaded areas by *Solanum elaeagnifolium* in Greece after linking in a GIS environment multiple raster layers extracted from selected geodatabases (for methodology used see Krigas et al. 2010, 2012).

**Table S1.** Main soil properties and related most significant categories as retrieved from the European Soil Database (ESDB) v2.0\* for the invaded and the non-invaded areas by *Solanum elaeagnifolium* in Greece with results of chi-square test for soil properties.

| Soil properties                                                                                                                                                | Category                                      | Percentage of records (%) of<br>invaded areas (Percentage % in<br>respect to the total areas<br>surveyed) | Percentage of records (%) of<br>non-invaded areas (Percentage<br>% in respect to the total areas<br>surveyed) | Percentage (%) of<br>invaded areas /<br>Percentage (%) of<br>non-invaded areas |
|----------------------------------------------------------------------------------------------------------------------------------------------------------------|-----------------------------------------------|-----------------------------------------------------------------------------------------------------------|---------------------------------------------------------------------------------------------------------------|--------------------------------------------------------------------------------|
| <b>Parent material</b><br><i>Pearson Chi-Square: Value</i><br><b>109.271, Asymptotic</b><br><i>Significance (2-sided) &lt;0.0001</i>                           | fluvial clays, silts and loams                | 46.81 (8.10)                                                                                              | 44.95 (91.90)                                                                                                 | 1.04                                                                           |
|                                                                                                                                                                | limestone                                     | 16.69 (5.60)                                                                                              | 23.94 (94.40)                                                                                                 | 0.70                                                                           |
|                                                                                                                                                                | acid regional metamorphic rocks               | 12.77 (8.10)                                                                                              | 12.14 (91.90)                                                                                                 | 1.05                                                                           |
| <b>FAO soil type</b><br><i>Pearson Chi-Square: Value</i><br><b>138.60, Asymptotic Significance</b><br><i>(2-sided) &lt;0.0001</i>                              | Calcaric Fluvisol                             | 20.29 (8.50)                                                                                              | 18.36 (91.50)                                                                                                 | 1.11                                                                           |
|                                                                                                                                                                | Calcaric Regosol                              | 14.48 (6.60)                                                                                              | 17.35 (93.40)                                                                                                 | 0.83                                                                           |
|                                                                                                                                                                | Calcaric Lithosol                             | 13.58 (5.30)                                                                                              | 20.37 (94.70)                                                                                                 | 0.67                                                                           |
|                                                                                                                                                                | Chromic Luvisol                               | 11.46 (9.40)                                                                                              | 9.31 (90.60)                                                                                                  | 1.23                                                                           |
|                                                                                                                                                                | Eutric Cambisol                               | 6.14 (18.00)                                                                                              | 6.96 (82.00)                                                                                                  | 0.88                                                                           |
|                                                                                                                                                                | Eutric Lithosol                               | 4.58 (8.80)                                                                                               | 6.44 (91.20)                                                                                                  | 0.71                                                                           |
|                                                                                                                                                                | Vertic Cambisol                               | 6.38 (6.90)                                                                                               | 5.58 (93.10)                                                                                                  | 1.14                                                                           |
|                                                                                                                                                                | Calcaro-Chromic Vertisol                      | 7.94 (5.70)                                                                                               | 3.05 (94.30)                                                                                                  | 2.60                                                                           |
| <b>Texture</b><br><i>Pearson Chi-Square: Value</i><br><b>90.367, Asymptotic</b><br><i>Significance (2-sided) &lt;0.0001</i>                                    | Fine (35% < clay < 60%)                       | 63.83 (7.10)                                                                                              | 67.29 (92.90)                                                                                                 | 0.95                                                                           |
|                                                                                                                                                                | Coarse (18% < clay > 65% sand)                | 15.63 (7.80)                                                                                              | 15.11 (92.80)                                                                                                 | 1.03                                                                           |
|                                                                                                                                                                | Medium (18% < clay < 35% and $\geq$ 15% sand) | 9.57 (18.00)                                                                                              | 9.38 (82.00)                                                                                                  | 1.02                                                                           |
| <b>Subsoil easily available<br/>water capacity</b><br><i>Pearson Chi-Square: Value</i><br><b>66.786 Asymptotic Significance</b><br><i>(2-sided) &lt;0.0001</i> | M = Medium (100 - 140 mm/m)                   | 44.84 (9.40)                                                                                              | 36.44 (90.60)                                                                                                 | 1.23                                                                           |
|                                                                                                                                                                | H = High (140 - 190 mm/m)                     | 23.32 (6.80)                                                                                              | 27.12 (93.20)                                                                                                 | 0.86                                                                           |
|                                                                                                                                                                | VL = Very low ( ~ 0 mm/m)                     | 20.54 (5.60)                                                                                              | 29.12 (94.40)                                                                                                 | 0.71                                                                           |
| <b>Depth to rock</b><br><i>Pearson Chi-Square: Value</i><br><b>51.55, Asymptotic Significance</b>                                                              | D = Deep (80 - 120 cm)                        | 33.06 (9.20)                                                                                              | 27.61 (90.80)                                                                                                 | 1.20                                                                           |
|                                                                                                                                                                | S = Shallow ( < 40 cm)                        | 21.52 (5.70)                                                                                              | 29.88 (94.30)                                                                                                 | 0.72                                                                           |
|                                                                                                                                                                | M = Moderate (40 - 80 cm)                     | 20.54 (7.50)                                                                                              | 21.40 (92.50)                                                                                                 | 0.96                                                                           |

|                                                                                 |                           |              |               |      |
|---------------------------------------------------------------------------------|---------------------------|--------------|---------------|------|
| (2-sided) <0.0001                                                               | V = Very deep ( > 120 cm) | 20.30 (8.50) | 18.48 (91.50) | 1.10 |
| <b>Base saturation of the topsoil</b>                                           |                           |              |               |      |
| Pearson Chi-Square: Value<br>14.07, Asymptotic Significance<br>(2-sided)< 0.001 | High (>75 %)              | 61.05 (7.60) | 62.31 (92.40) | 0.98 |
| <b>Topsoil organic carbon content</b>                                           |                           |              |               |      |
| Pearson Chi-Square: Value<br>5.772, Asymptotic<br>Significance (2-sided)=0.016  | L = Low (1 - 2 %)         | 72.09 (8.30) | 67.45 (91.70) | 1.07 |
|                                                                                 | V = Very low ( < 1 %)     | 23.32 (6.20) | 29.92 (93.80) | 0.78 |

\*Composed of the Soil Geographical Database of Eurasia at a scale of 1:1000000 (version 4 beta) and the Pedotransfer Rules Database (v2.0), with raster resolution of 1 km<sup>2</sup> and FAO soil types (CORINE soil classification).

**Table S2.** Mean values of temperature and precipitation bioclimatic variables for the invaded and non-invaded areas by *S. elaeagnifolium* and results of GLM models testing differences on equal numbers of confirmed presences and randomly generated true absences. \*\*\*:  $P < 0.001$  ( $P$  values have been adjusted according to Bonferroni correction). NS: Non Significant. Data from the WorldClim database (Guarino et al., 2002; Hijmans et al., 2005) with a raster resolution of 1km<sup>2</sup> (average values of 30 years).

| Variable                                                               | Mean values ± STDEV in<br>invaded areas (n = 1564) | Mean values ± STDEV in non-<br>invaded areas (n = 14172) | F      | P   |
|------------------------------------------------------------------------|----------------------------------------------------|----------------------------------------------------------|--------|-----|
| Annual Mean Temperature (°C)                                           | 15.76 ±1.71                                        | 15.97 ±2.16                                              | 8.50   | NS  |
| Temperature Annual Range (BIO5-BIO6) (°C)                              | 28.62 ±3.45                                        | 26.63 ±4.29                                              | 105.72 | *** |
| Temperature Seasonality (STDEV *100)                                   | 670.14 ±65.44                                      | 623.53 ±79.2                                             | 172.60 | *** |
| Mean Diurnal Range {Mean of monthly (max temp - min temp)}             | 9.61 ±1.47                                         | 9.05 ±1.85                                               | 42.11  | *** |
| Isothermality { Mean Diurnal Range/ Temperature Annual Range) (* 100)} | 3.3 ±0.19                                          | 3.32 ±0.27                                               | 11.40  | NS  |
| Max Temperature of Warmest Month (°C)                                  | 31.46 ±1.91                                        | 30.62 ±2.22                                              | 59.00  | *** |
| Min Temperature of Coldest Month (°C)                                  | 2.85 ±2.8                                          | 3.99 ±3.49                                               | 59.03  | *** |
| Mean Temperature of Wettest Quarter (°C)                               | 9.82 ±2.33                                         | 10.07 ±2.5                                               | 6.48   | NS  |
| Mean Temperature of Driest Quarter (°C)                                | 24.22 ±1.62                                        | 23.93 ±1.95                                              | 6.60   | NS  |
| Mean Temperature of Warmest Quarter (°C)                               | 24.47 ±1.6                                         | 24.07 ±1.93                                              | 15.00  | NS  |
| Mean Temperature of Coldest Quarter (°C)                               | 7.41 ±2.33                                         | 8.26 ±2.9                                                | 49.00  | *** |
| Annual Precipitation (mm)                                              | 56.49 ±16.38                                       | 66.54 ±20.8                                              | 105.59 | *** |

|                                                |              |              |        |     |
|------------------------------------------------|--------------|--------------|--------|-----|
| Precipitation Seasonality (Coef. of Var.) (mm) | 4.81 ±2.03   | 6.07 ±2.27   | 142.40 | *** |
| Precipitation of Wettest Month (mm)            | 8.8 ±3.88    | 11.59 ±4.77  | 154.08 | *** |
| Precipitation of Driest Month (mm)             | 1.34 ±0.74   | 1.06 ±0.87   | 56.54  | *** |
| Precipitation of Wettest Quarter (mm)          | 23.67 ±10.08 | 30.88 ±12.45 | 154.16 | *** |
| Precipitation of Driest Quarter (mm)           | 5.39 ±2.52   | 4.3 ±3.08    | 68.43  | *** |
| Precipitation of Warmest Quarter (mm)          | 5.8 ±2.74    | 4.68 ±3.22   | 60.74  | *** |
| Precipitation of Coldest Quarter (mm)          | 21.22 ±9.22  | 27.48 ±11.08 | 143.89 | *** |

## References

- Guarino, L., Jarvis, A., Hijmans, R.J., Maxted, N. Geographic information systems (GIS) and the conservation and use of plant genetic resources. In *Managing plant genetic diversity*, Engels, J.M.M., Ramanatha Rao, V., Brown, A.H.D., Jackson, M.T. (Eds); International Plant Genetic Resources Institute: Rome, Italy, 2002; pp. 387–404.
- Hijmans, R.J., Cameron, S.E., Parra, J.L., Jones, P.G., Jarvis, A. 2005. Very high-resolution interpolated climate surfaces for global land areas. *Intern. J. Climatol.* **2002**, 25, 1965–1978.
- Krigas, N., Mouflis, G., Grigoriadou, K., Maloupa, E. Conservation of important plants from the Ionian Islands at the Balkan Botanic Garden of Kroussia, N Greece: using GIS to link the in situ collection data with plant propagation and ex situ cultivation. *Biodivers. Conserv.* **2010**, 19, 3583–3603. DOI:10.1007/s10531-010-9917-7.
- Krigas, N., Papadimitriou, K., Mazaris, A.D. GIS and ex situ plant conservation. In *Application of Geographic Information Systems*, Alam, B.M., Ed.; InTechopen.com: Rijeka, Croatia, 2012; pp. 153-174.
